# Supplementary material
Source: MDPI journal article supplement (https://www.mdpi.com/search?q=sensors-20-03043)
Supplement: s001 [file sensors-20-03043-s001.pdf]

# Double Role of Diphenylpyridine Derivatives as Fluorescent Sensors for Monitoring Photopolymerization and the Determination of the Efficiencies of the Generation of Superacids by Cationic Photoinitiators

Monika Topa <sup>1</sup>, Filip Petko <sup>2</sup>, Mariusz Galek <sup>2</sup>, and Joanna Ortyl <sup>1,2,\*</sup>

<sup>1</sup> Faculty of Chemical Engineering and Technology, Cracow University of  
Technology, Warszawska 24, 30-155 Cracow, Poland;

<sup>2</sup> Photo HiTech Ltd., Bobrzyńskiego 14, 30-348 Cracow, Poland;

\* Correspondence: [jortyl@pk.edu.pl](mailto:jortyl@pk.edu.pl) (J.O.)

## Synthesis - Chemicals and general synthetic procedures of 2,6-diphenylpyridine derivatives

All inorganic salts organic reagents, and solvents were analytically pure and used as received. Structure and purity of obtained products were confirmed by NMR and LC–MS analysis.

$^1\text{H}$  NMR and  $^{13}\text{C}$  NMR spectra were recorded in  $\text{DMSO}-\text{D}_6$  on Avance III HD 400 MHz (Bruker) spectrometer. Chemical shifts were reported in parts per million ( $\delta$ ) and referenced to residual protonated solvent peak ( $\delta=2.50$  ppm in  $^1\text{H}$  NMR spectra and 39.52 ppm  $^{13}\text{C}$  NMR spectra).

LC–MS analyses were obtained on LCMS–2020 (Shimadzu) with ESI ionization method.

### Synthesis of 2,6-diphenylpyridine derivatives

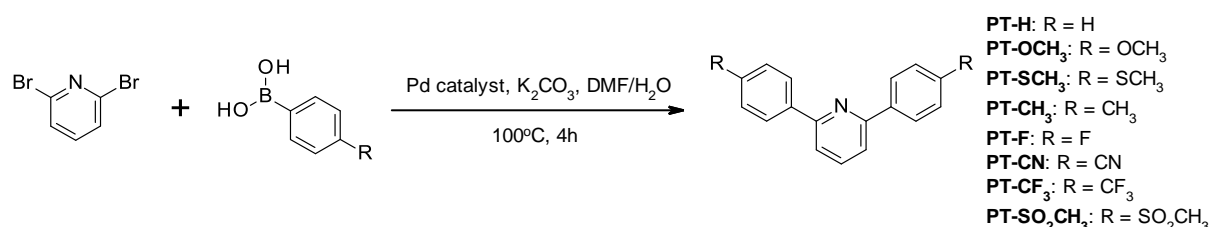

#### Example: PT-H

2,6-Dibromopyridine (0.85 mmol, 200 mg), Phenylboronic (2.13 mmol, 260 mg), Tetrakis(triphenylphosphine) Palladium (10 %mol, 98 mg) and  $\text{K}_2\text{CO}_3$  (2.98 mmol, 412 mg) were dissolved in DMF (3.0  $\text{cm}^3$ ) and  $\text{H}_2\text{O}$  (0.3  $\text{cm}^3$ ) in pressure tube. Oxygen was removed with argon and mixture was heated for 4 hours in temperature  $100^\circ\text{C}$ . When reaction was finished,  $\text{H}_2\text{O}$  was added and product was extracted with EtOAc. Organic phase was washed with brine, dried over  $\text{Na}_2\text{SO}_4$  and concentrated. Product was purified using flash chromatography followed by recrystallization from methanol.

|                                                                        |                                                                                                                                                                                                                                                                                                                                                                                                                                                                |
|------------------------------------------------------------------------|----------------------------------------------------------------------------------------------------------------------------------------------------------------------------------------------------------------------------------------------------------------------------------------------------------------------------------------------------------------------------------------------------------------------------------------------------------------|
| <p>2,6-diphenylpyridine,<br/><b>PT-H</b></p>                           | <p>Yield: 0.067 g (34%);<br/> <math>^1\text{H}</math> NMR (400 MHz, DMSO) <math>\delta</math> 8.23 (d, 4H), 8.01 – 7.91 (m, 3H), 7.54 (t, 4H), 7.47 (t, 2H).<br/> <math>^{13}\text{C}</math> NMR (101 MHz, DMSO) <math>\delta</math> 156.09, 139.14, 138.83, 129.63, 129.25, 127.08, 119.32.<br/>                     MS (ESI) <math>m/z</math>(%): 232.14 (100%, <math>[\text{M}+\text{H}]^+</math>); purity (LC): 99.4%.</p>                                 |
| <p>2,6-bis(4-methoxyphenyl)pyridine,<br/><b>PT-OCH<sub>3</sub></b></p> | <p>Yield: 0.105 g (42%);<br/> <math>^1\text{H}</math> NMR (400 MHz, DMSO) <math>\delta</math> 8.16 (d, J = 8.5 Hz, 4H), 7.91 – 7.77 (m, 3H), 7.08 (d, J = 8.5 Hz, 4H), 3.84 (s, 6H).<br/> <math>^{13}\text{C}</math> NMR (101 MHz, DMSO) <math>\delta</math> 160.63, 155.66, 138.50, 131.76, 128.38, 117.65, 114.58, 55.70.<br/>                     MS (ESI) <math>m/z</math>(%): 292.21 (100%, <math>[\text{M}+\text{H}]^+</math>); purity (LC): 100.0%.</p> |

|                                                                                                                                                                                 |                                                                                                                                                                                                                                                                                                                                                             |
|---------------------------------------------------------------------------------------------------------------------------------------------------------------------------------|-------------------------------------------------------------------------------------------------------------------------------------------------------------------------------------------------------------------------------------------------------------------------------------------------------------------------------------------------------------|
| <p>2,6-bis(4-methylsulphanylphenyl)pyridine,<br/><b>PT-SCH<sub>3</sub></b></p> 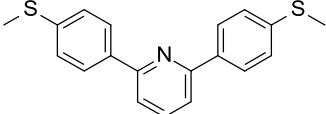                | <p>Yield: 0.160 g (58%);<br/> <sup>1</sup>H NMR (400 MHz, DMSO) δ 8.17 (d, J = 8.5 Hz, 4H), 7.97 – 7.87 (m, 3H), 7.41 (d, J = 8.5 Hz, 4H), 2.55 (s, 6H).<br/> <sup>13</sup>C NMR (101 MHz, DMSO) δ 155.49, 140.19, 138.77, 135.56, 127.44, 126.31, 118.64, 14.90.<br/> MS (ESI) m/z(%): 324.18 (100%, [M+H]<sup>+</sup>); purity (LC): 99.6%.</p>           |
| <p>2,6-bis(p-tolyl)pyridine,<br/><b>PT-CH<sub>3</sub></b></p>                                  | <p>Yield: 0.139 g (63%);<br/> <sup>1</sup>H NMR (400 MHz, DMSO) δ 8.11 (d, J = 8.1 Hz, 4H), 7.91 (m, 6.6 Hz, 3H), 7.34 (d, J = 8.0 Hz, 4H), 2.39 (s, 6H).<br/> <sup>13</sup>C NMR (101 MHz, DMSO) δ 155.97, 139.09, 138.63, 136.46, 129.83, 126.94, 118.61, 21.34.<br/> MS (ESI) m/z(%): 260.18 (100%, [M+H]<sup>+</sup>); purity (LC): 100.0%.</p>         |
| <p>2,6-bis(4-fluorophenyl)pyridine,<br/><b>PT-F</b></p>                                        | <p>Yield: 0.059 g (26%);<br/> <sup>1</sup>H NMR (400 MHz, DMSO) δ 8.17 (d, J = 8.5 Hz, 4H), 7.97 – 7.87 (m, 3H), 7.41 (d, J = 8.5 Hz, 4H), 2.55 (s, 6H).<br/> <sup>13</sup>C NMR (101 MHz, DMSO) δ 164.64, 162.20, 155.06, 139.00, 135.53, 129.28, 119.09, 116.21, 116.00.<br/> MS (ESI) m/z(%): 268.16 (100%, [M+H]<sup>+</sup>); purity (LC): 100.0%.</p> |
| <p>2,6-bis(4-cyanophenyl)pyridine,<br/><b>PT-CN</b></p>                                      | <p>Yield: 0.151 g (63%);<br/> <sup>1</sup>H NMR (400 MHz, DMSO) δ 8.45 (d, J = 8.1 Hz, 4H), 8.17 – 8.11 (m, 3H), 7.91 (d, J = 8.2 Hz, 4H).<br/> <sup>13</sup>C NMR (101 MHz, DMSO) δ 154.43, 142.90, 139.54, 133.29, 127.92, 121.43, 119.24, 112.22.<br/> MS (ESI) m/z(%): 282.18 (100%, [M+H]<sup>+</sup>); purity (LC): 98.3%.</p>                        |
| <p>2,6-bis[4-(trifluoromethyl)phenyl]pyridine,<br/><b>PT-CF<sub>3</sub></b></p>              | <p>Yield: 0.192 g (61%);<br/> <sup>1</sup>H NMR (400 MHz, DMSO) δ 8.31 – 8.24 (m, 4H), 8.01 – 7.90 (m, 3H), 7.36 (t, J = 8.9 Hz, 4H).<br/> <sup>13</sup>C NMR (101 MHz, DMSO) δ 154.82, 142.68, 139.48, 130.04, 129.72, 127.93, 126.18, 123.39, 121.09.<br/> MS (ESI) m/z(%): 368.18 (100%, [M+H]<sup>+</sup>); purity (LC): 95.3%.</p>                     |
| <p>2,6-bis(4-methylsulphonylphenyl)pyridine,<br/><b>PT-SO<sub>2</sub>CH<sub>3</sub></b></p>  | <p>Yield: 0.105 g (32%);<br/> <sup>1</sup>H NMR (400 MHz, DMSO) δ 8.49 (d, J = 8.4 Hz, 4H), 8.22 – 7.99 (m, 7H), 3.30 (s, 6H).<br/> <sup>13</sup>C NMR (101 MHz, DMSO) δ 154.80, 143.49, 141.67, 139.55, 128.69, 128.18, 128.05, 121.50, 44.00.<br/> MS (ESI) m/z(%): 388.12 (100%, [M+H]<sup>+</sup>); purity (LC): 93.8%.</p>                             |

## NMR spectra of synthesized 2,6-diphenylpyridine

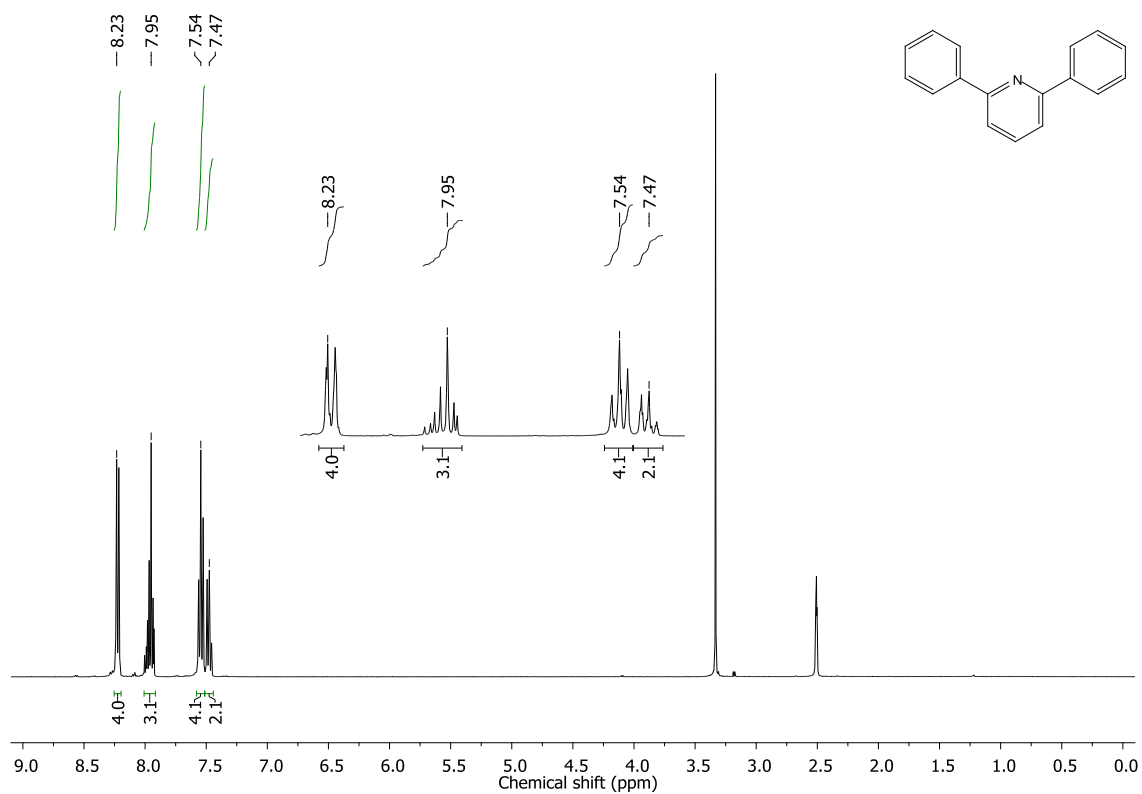

Figure S1:  $^1\text{H}$  NMR spectrum of 2,6-diphenylpyridine, *PT-H*.

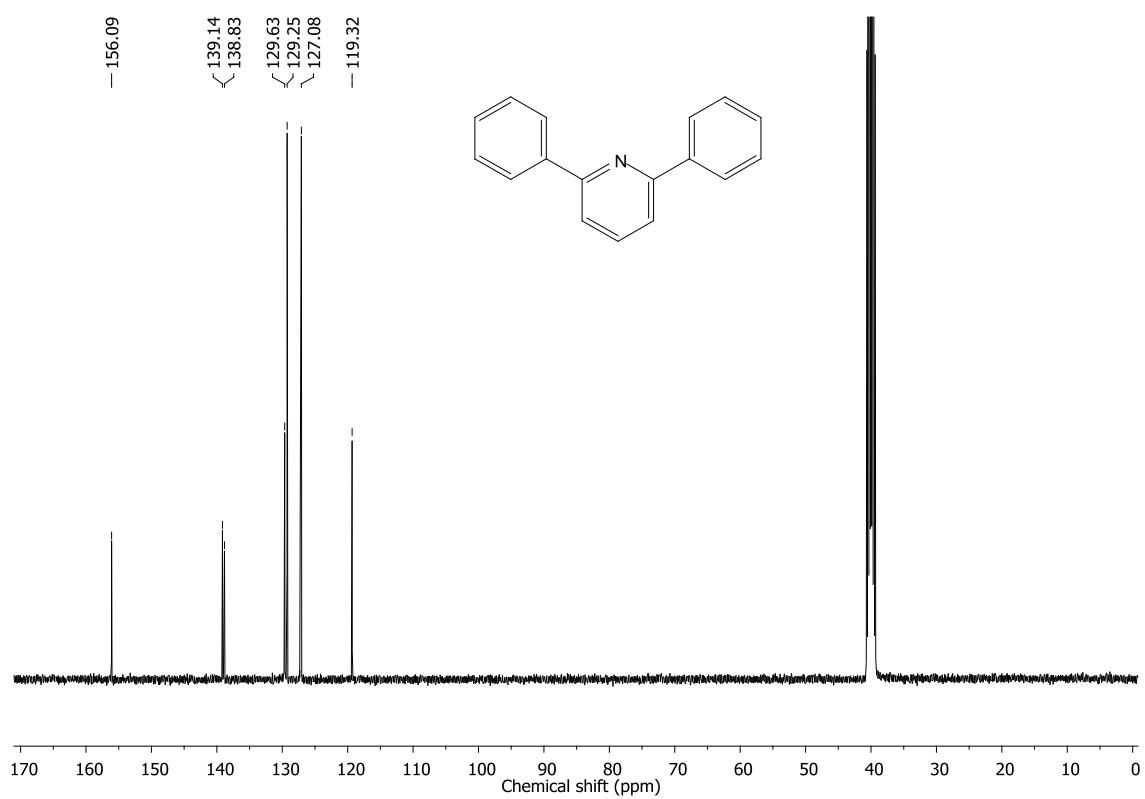

Figure S2:  $^{13}\text{C}$  NMR spectrum of 2,6-diphenylpyridine, *PT-H*.

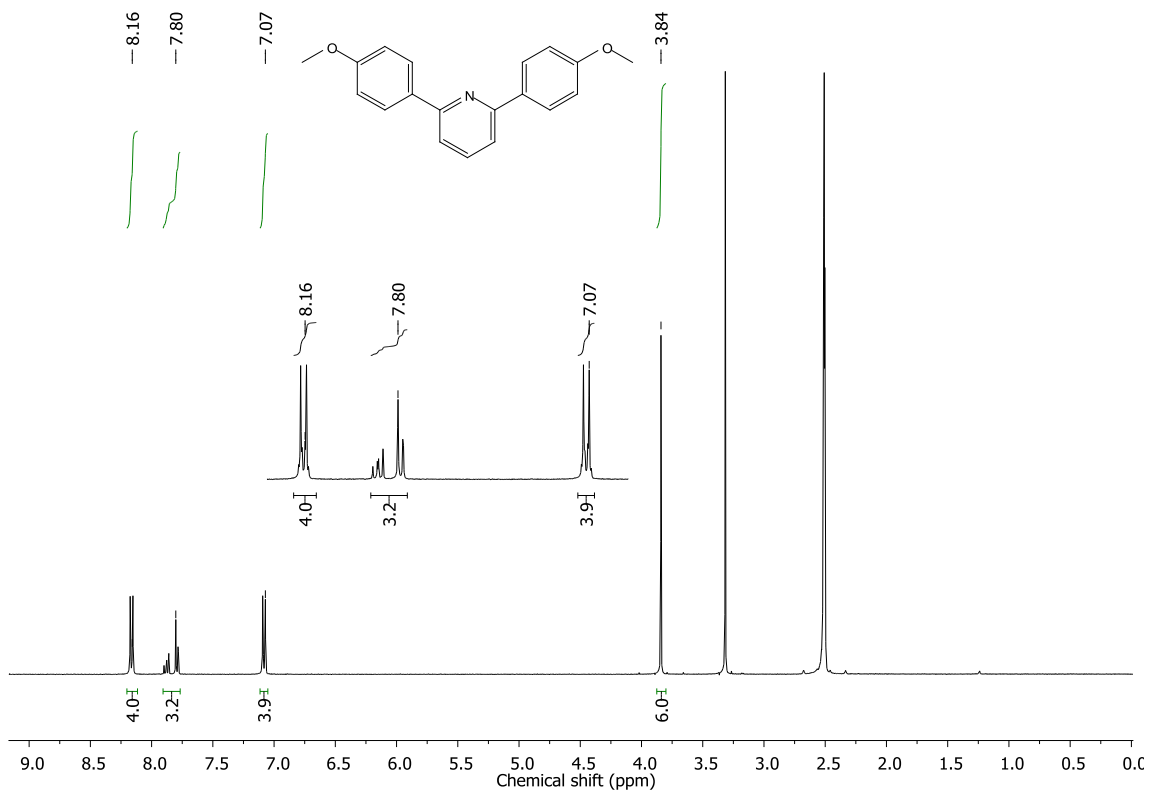

**Figure S3:**  $^1\text{H}$  NMR spectrum of 2,6-bis(4-methoxyphenyl)pyridine *PT-OCH<sub>3</sub>*.

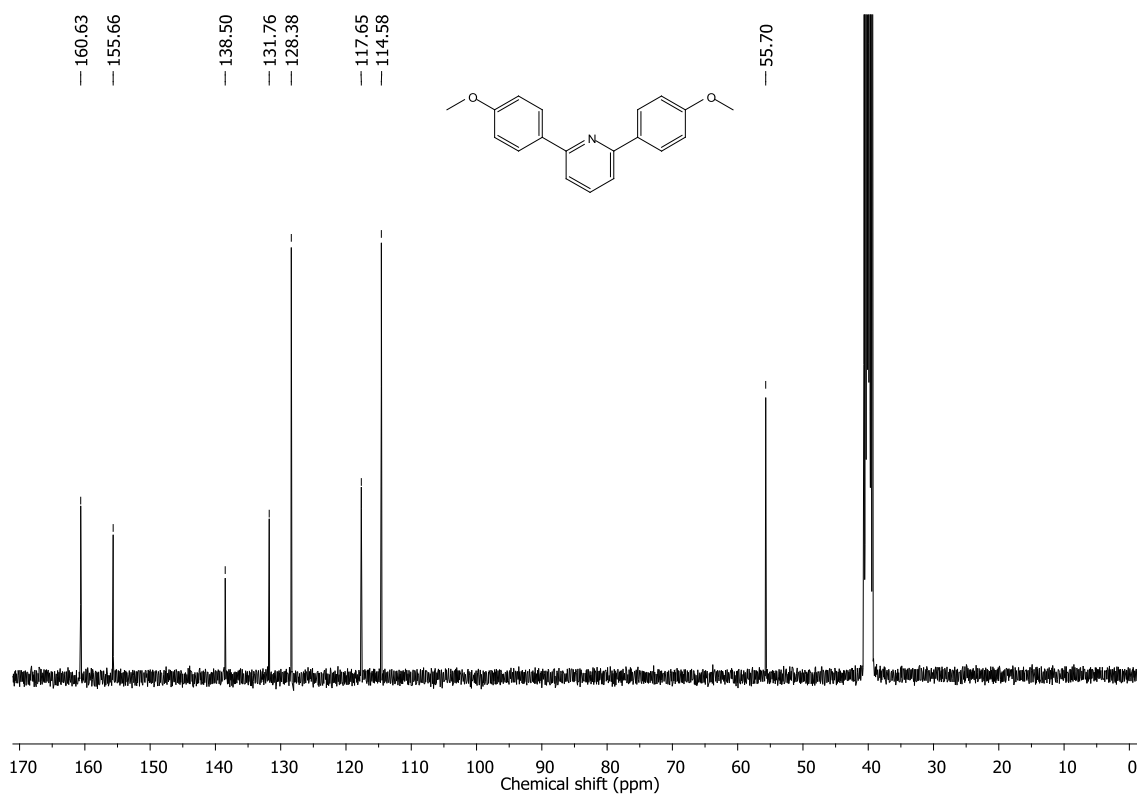

**Figure S4:**  $^{13}\text{C}$  NMR spectrum of 2,6-bis(4-methoxyphenyl)pyridine *PT-OCH<sub>3</sub>*.

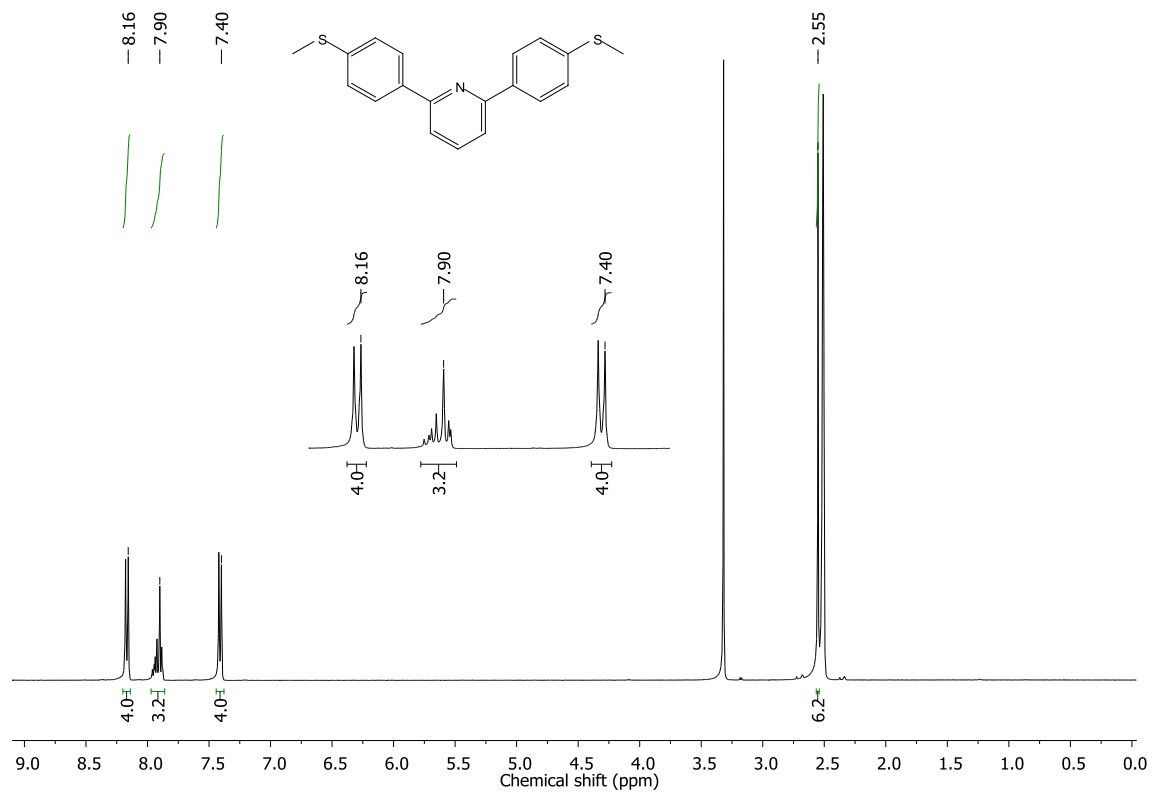

**Figure S5:**  $^1\text{H}$  NMR spectrum of 2,6-bis(4-methylsulphonylphenyl)pyridine *PT-SCH<sub>3</sub>*.

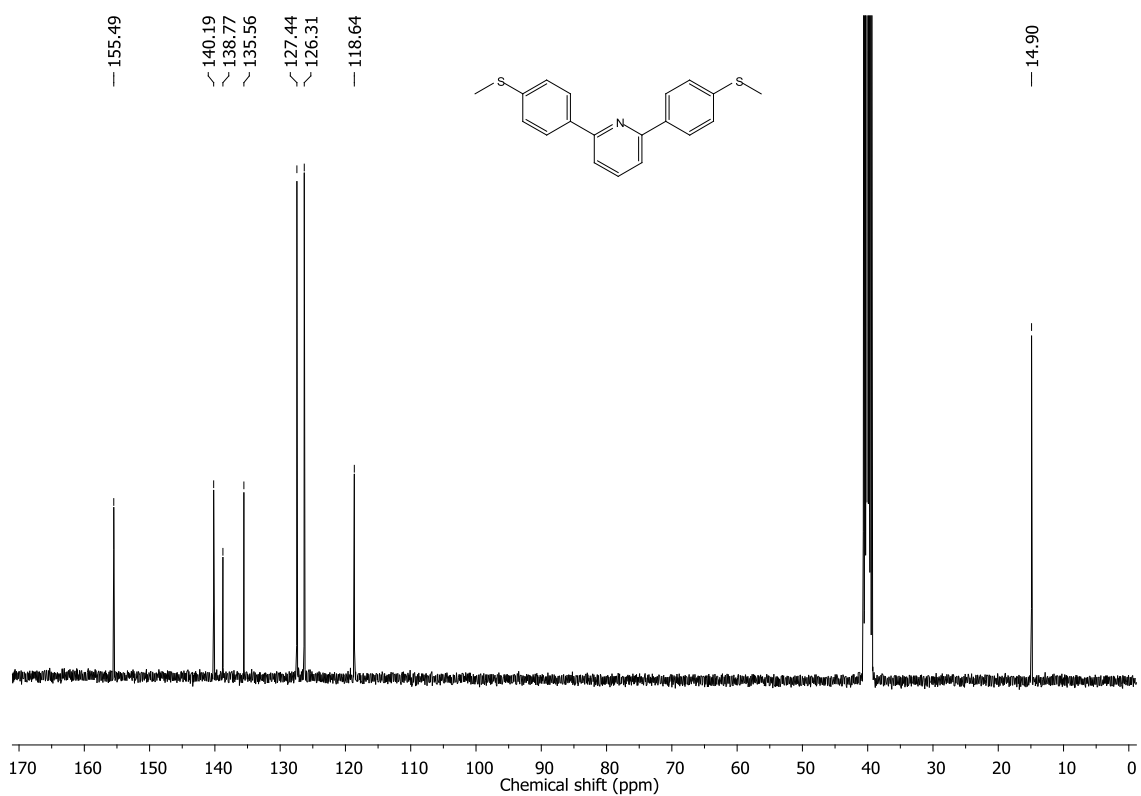

**Figure S6:**  $^{13}\text{C}$  NMR spectrum of 2,6-bis(4-methylsulphonylphenyl)pyridine *PT-SCH<sub>3</sub>*.

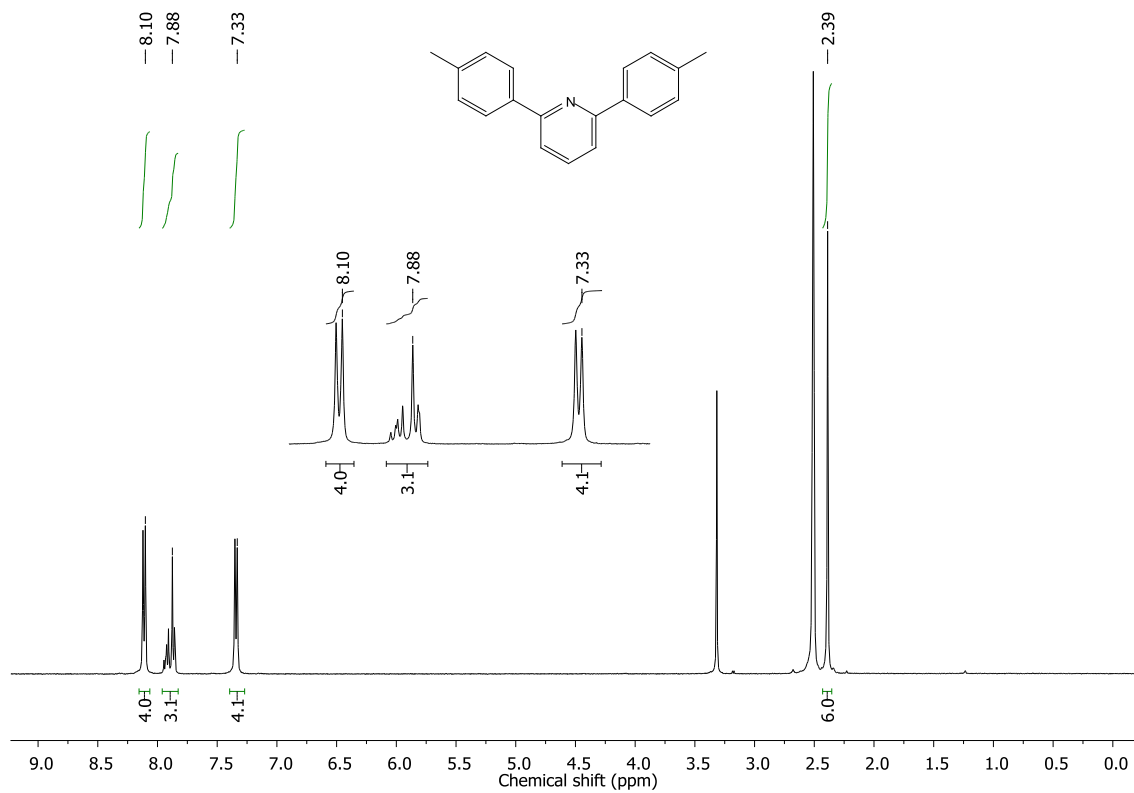

Figure S7:  $^1\text{H}$  NMR spectrum of 2,6-bis(p-tolyl)pyridine *PT-CH<sub>3</sub>*.

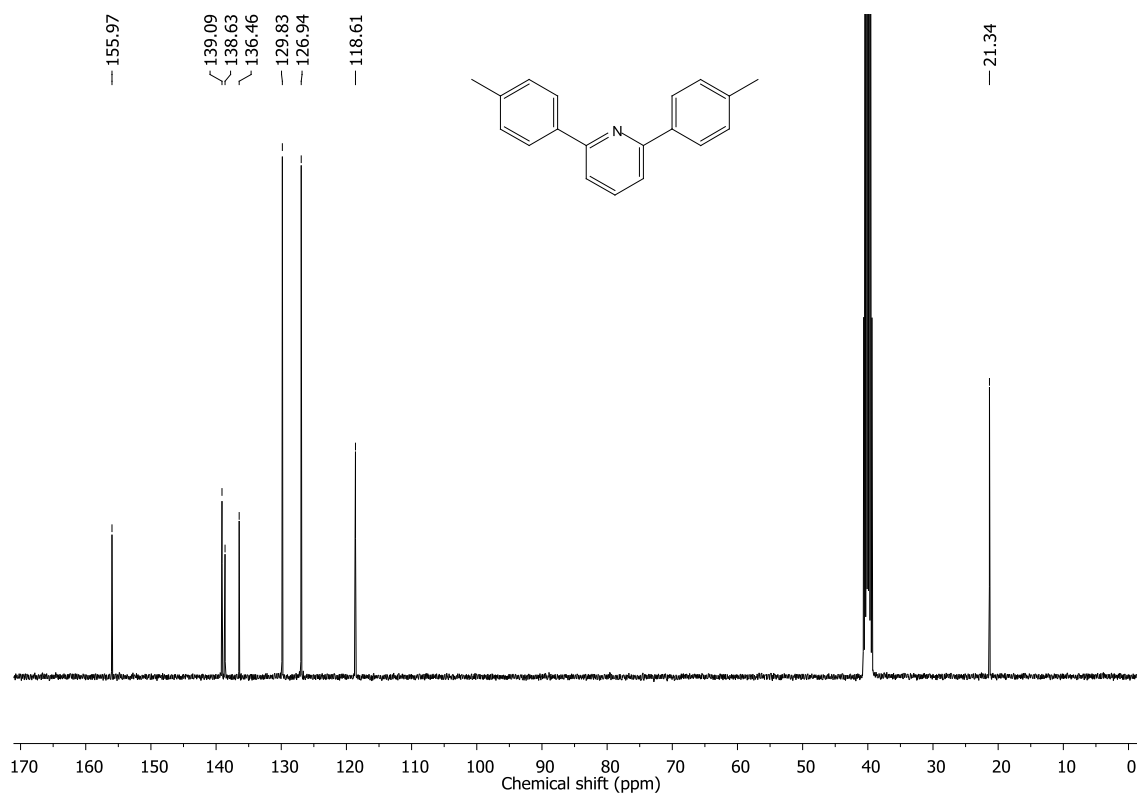

Figure S8:  $^{13}\text{C}$  NMR spectrum of 2,6-bis(p-tolyl)pyridine *PT-CH<sub>3</sub>*.

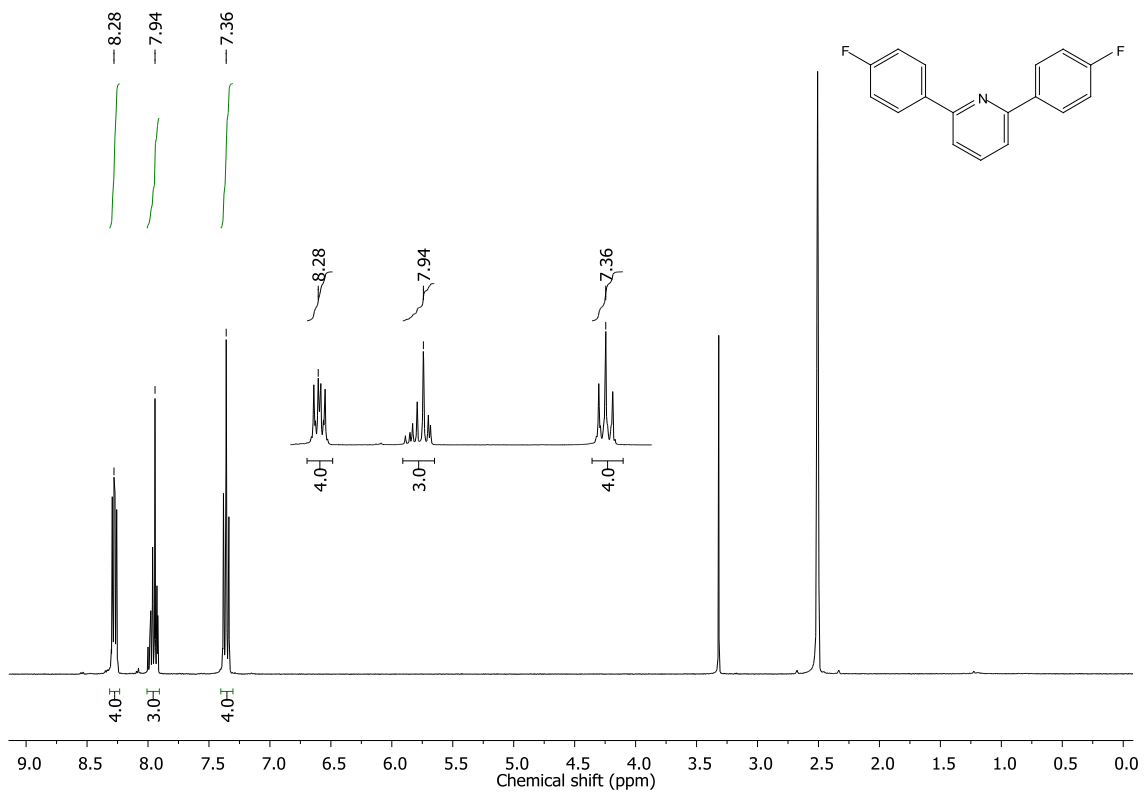

Figure S9:  $^1\text{H}$  NMR spectrum of 2,6-bis(4-fluorophenyl)pyridine *PT-F*.

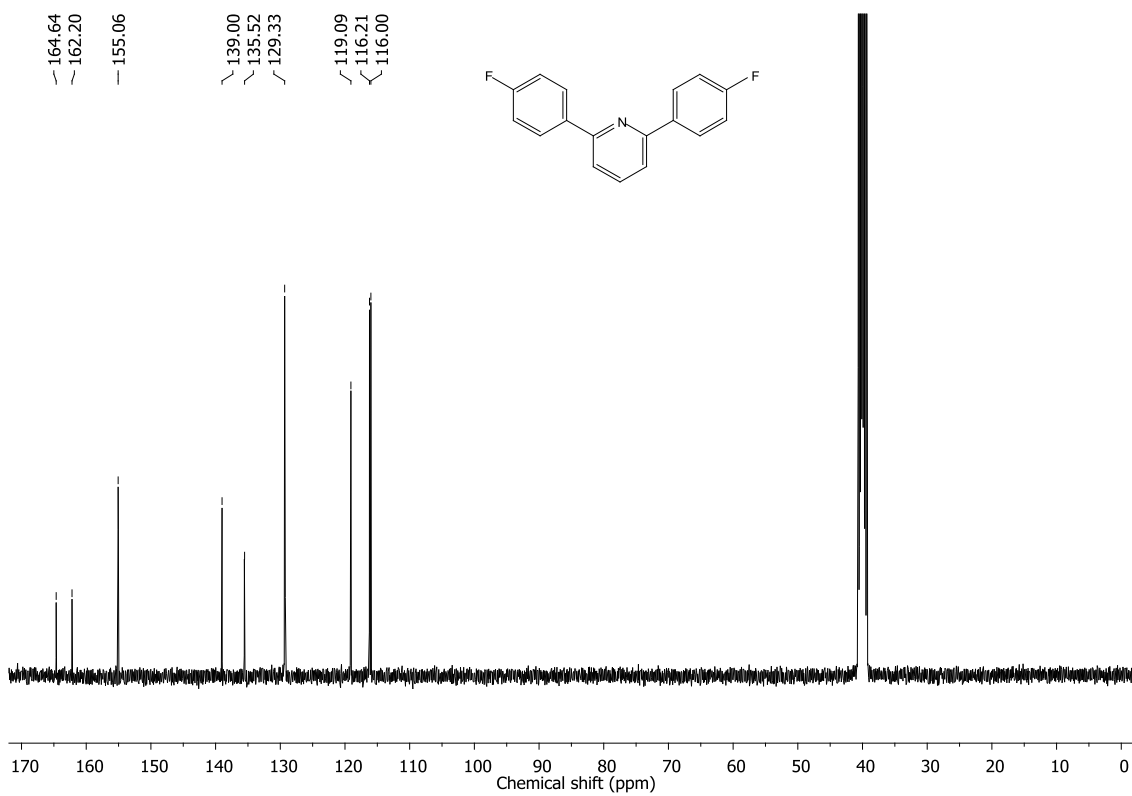

Figure S10:  $^{13}\text{C}$  NMR spectrum of 2,6-bis(4-fluorophenyl)pyridine *PT-F*.



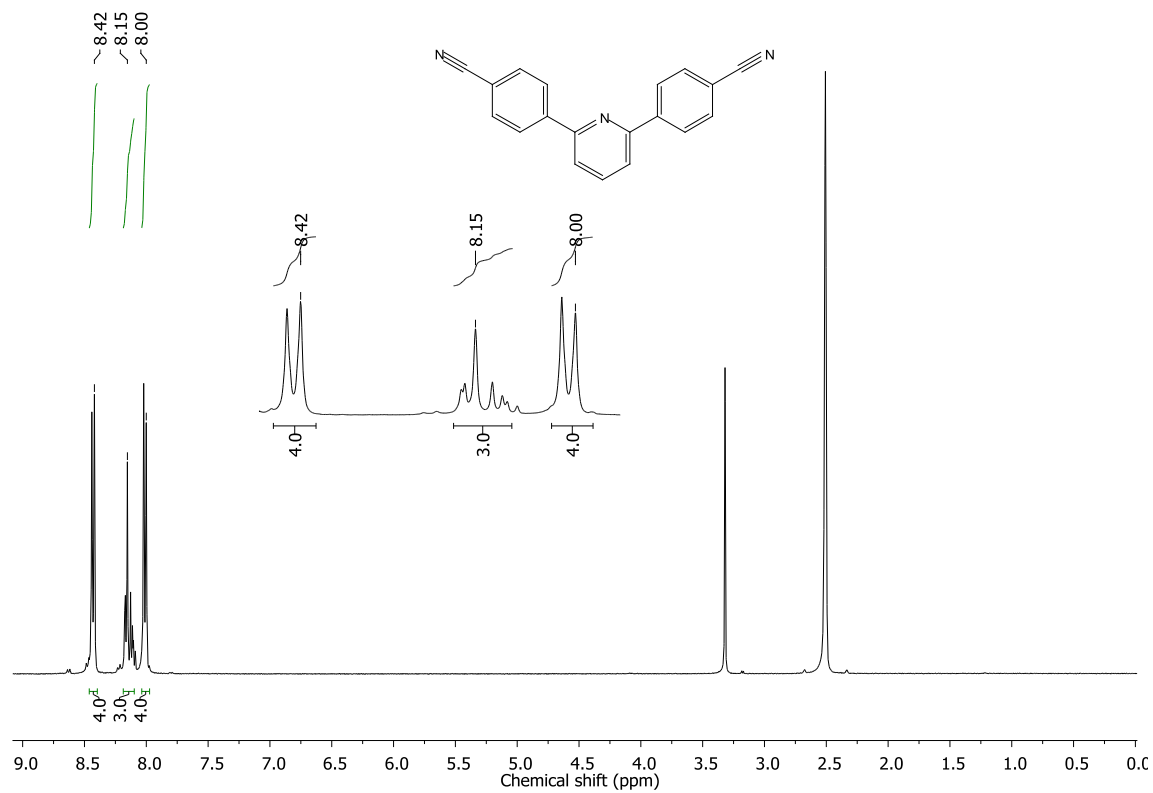

Figure S11: <sup>1</sup>H NMR spectrum of 2,6-bis(4-cyanophenyl)pyridine *PT-CN*.

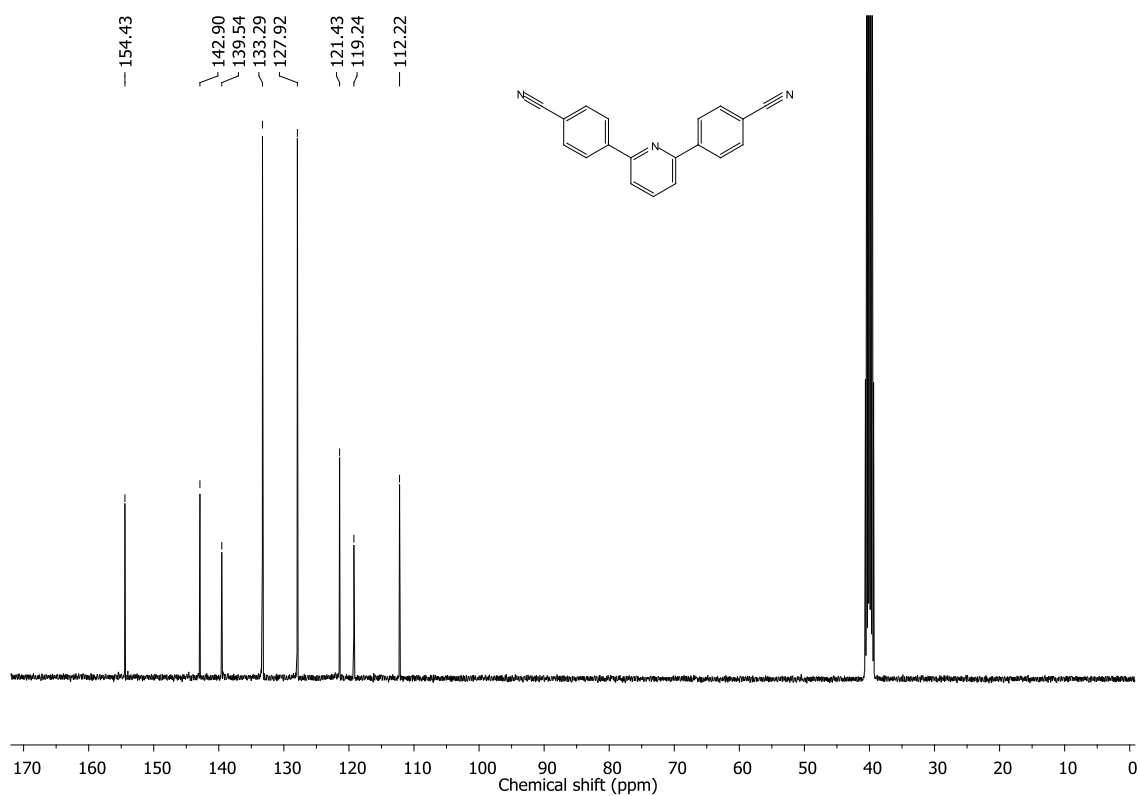

Figure S12: <sup>13</sup>C NMR spectrum of 2,6-bis(4-cyanophenyl)pyridine *PT-CN*.

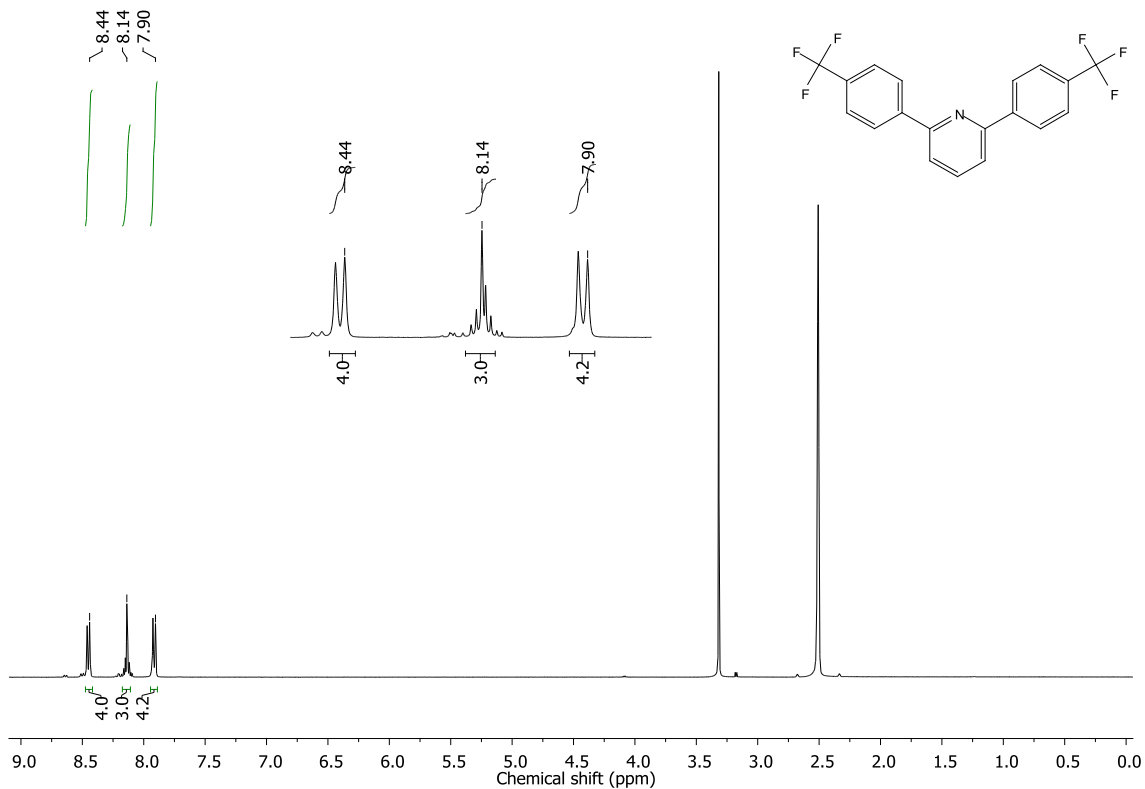

**Figure S13:** <sup>1</sup>H NMR spectrum of 2,6-bis[4-(trifluoromethyl)phenyl]pyridine *PT-CF<sub>3</sub>*.

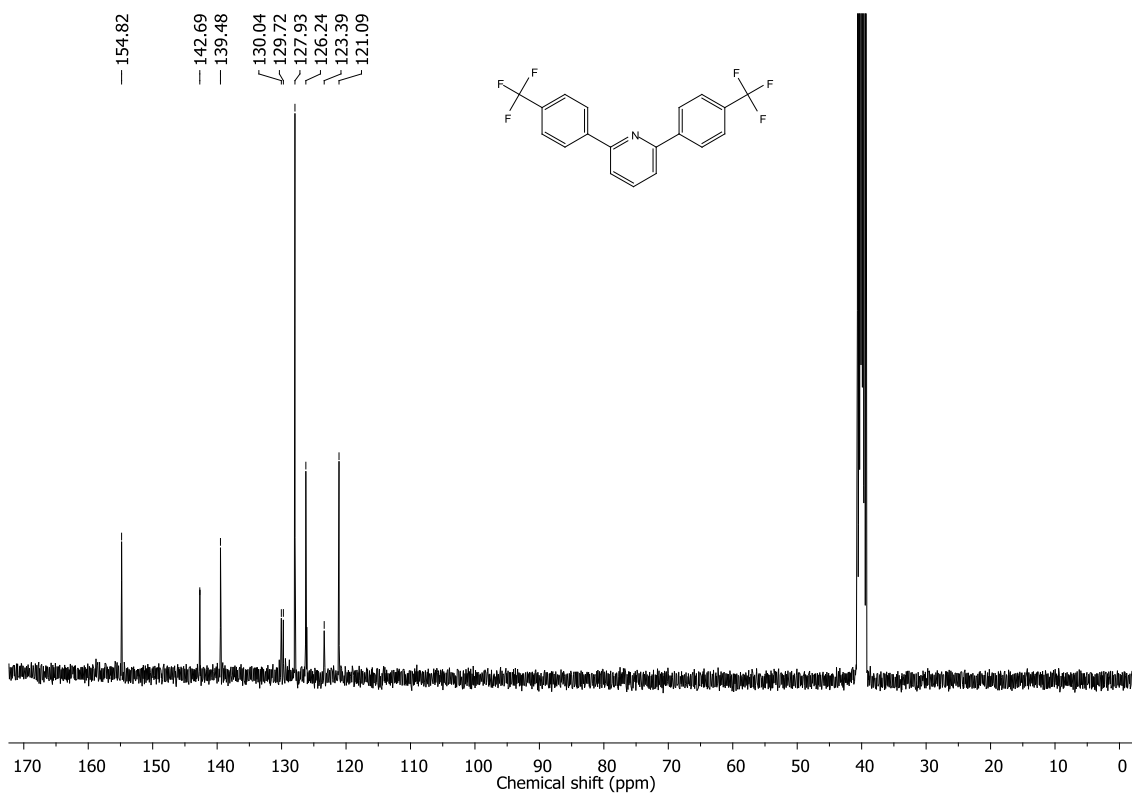

**Figure S14:** <sup>13</sup>C NMR spectrum of 2,6-bis[4-(trifluoromethyl)phenyl]pyridine *PT-CF<sub>3</sub>*.

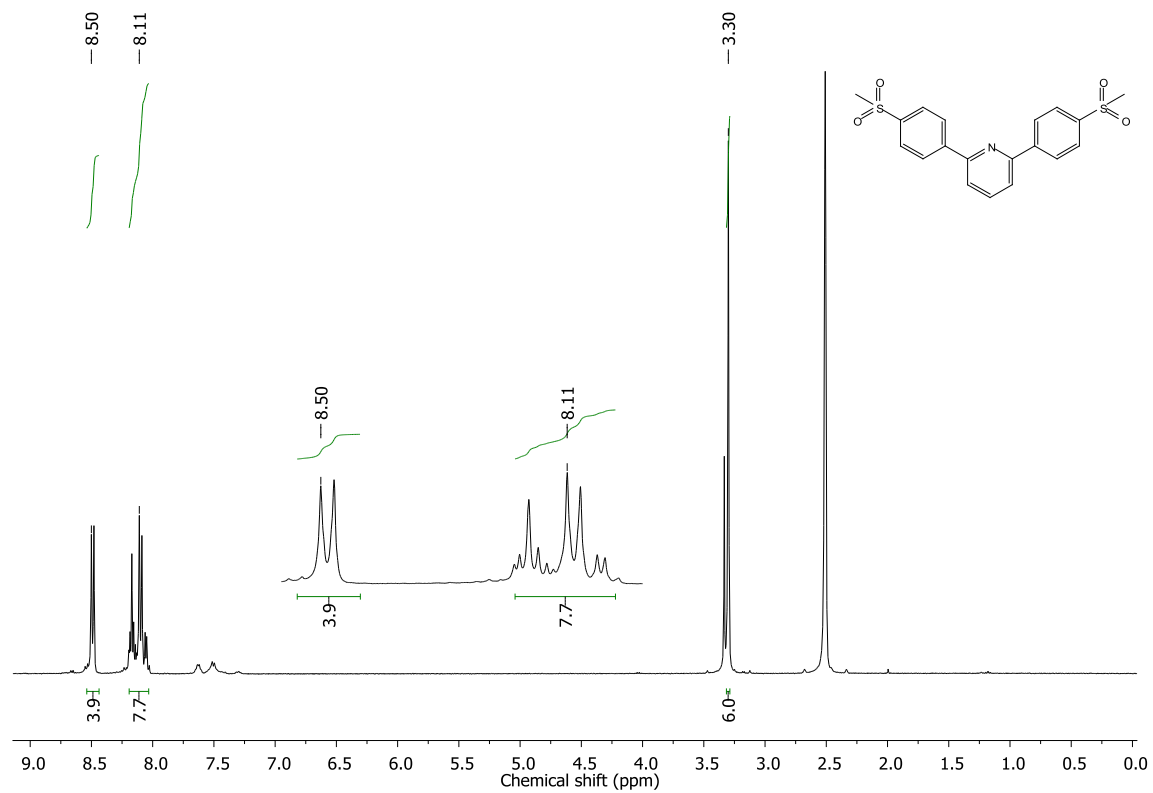

Figure S15:  $^1\text{H}$  NMR spectrum of 2,6-bis(4-methylsulphonylphenyl)pyridine *PT-SO<sub>2</sub>CH<sub>3</sub>*.

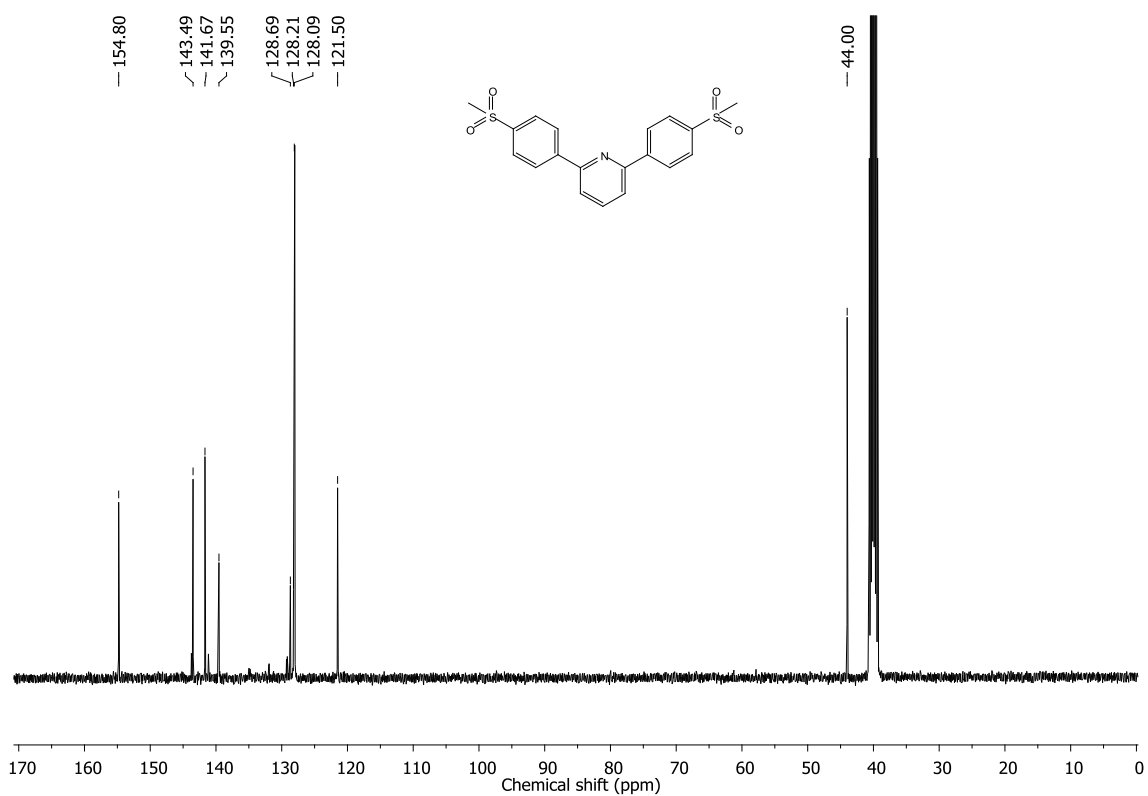

Figure S16:  $^{13}\text{C}$  NMR spectrum of 2,6-bis(4-methylsulphonylphenyl)pyridine *PT-SO<sub>2</sub>CH<sub>3</sub>*.

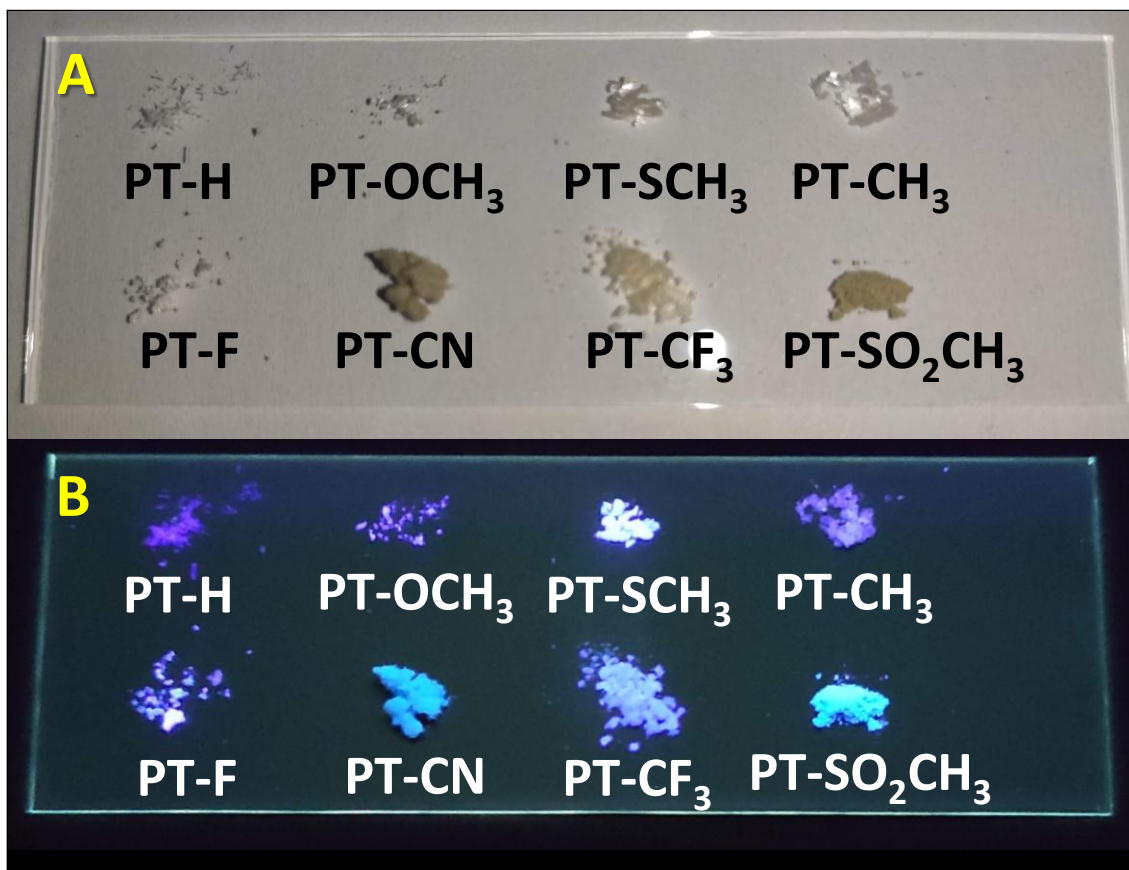

Figure S17: Synthesized compounds in powder form under: (a) sun light; (b) UV 254 nm light.

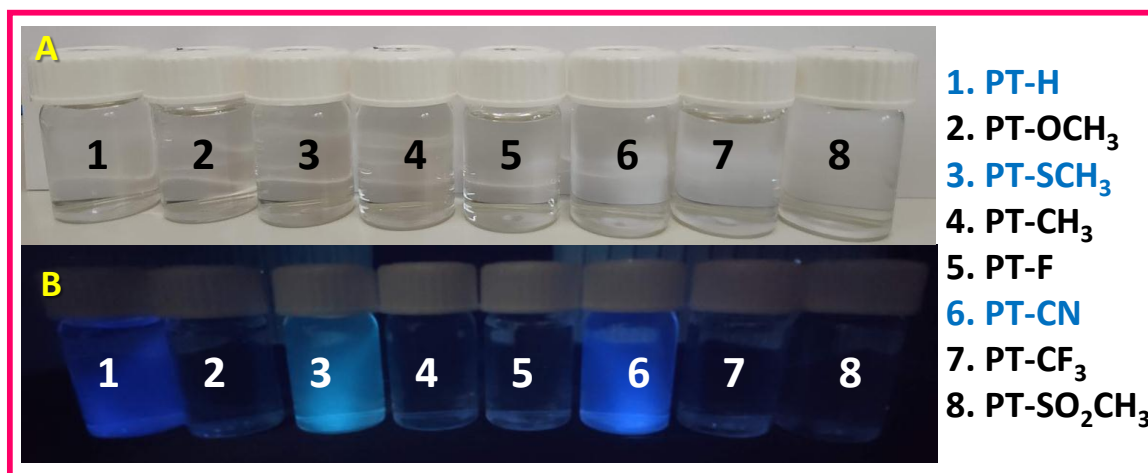

Figure S18: Synthesized compounds dissolved in acetonitrile under: (a) sun light; (b) UV 365 nm light.

Photolysis of 2,6-diphenylpyridine derivatives under 300nm (26mW/cm<sup>2</sup>).

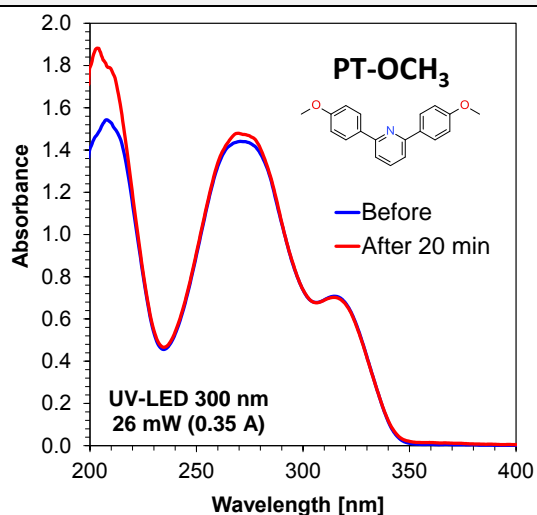

**Figure S19:** Photolysis of PT-OCH<sub>3</sub> (concentration:  $6.87 \cdot 10^{-5}$  [mol/dm<sup>3</sup>]) in ACN under 300nm (26mW/cm<sup>2</sup>).

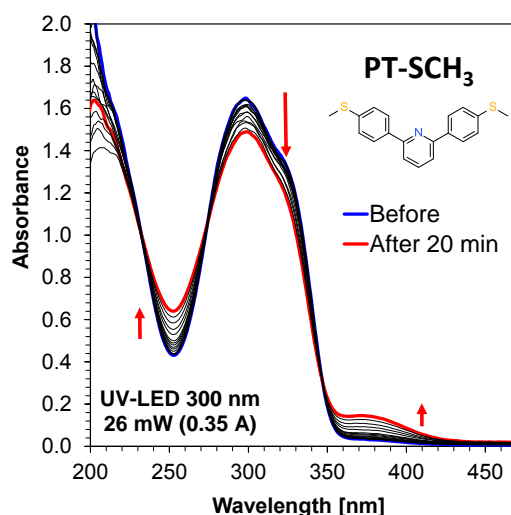

**Figure S20:** Photolysis of PT-SCH<sub>3</sub> (concentration:  $6.38 \cdot 10^{-5}$  [mol/dm<sup>3</sup>]) in ACN under 300nm (26mW/cm<sup>2</sup>).

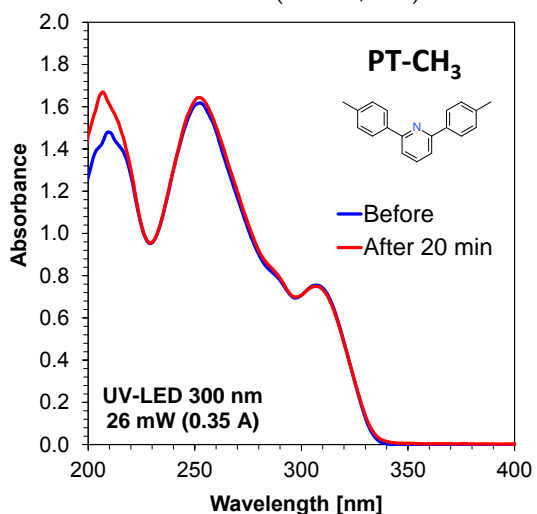

**Figure S21:** Photolysis of PT-CH<sub>3</sub> (concentration:  $8.03 \cdot 10^{-5}$  [mol/dm<sup>3</sup>]) in ACN under 300nm (26mW/cm<sup>2</sup>).

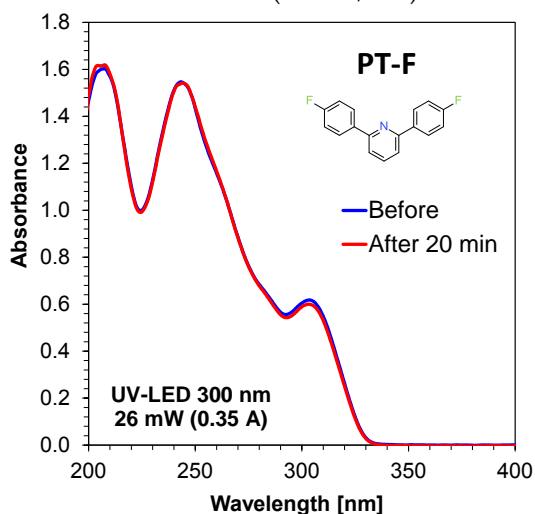

**Figure S22:** Photolysis of PT-F (concentration:  $7.34 \cdot 10^{-5}$  [mol/dm<sup>3</sup>]) in ACN under 300nm (26mW/cm<sup>2</sup>).

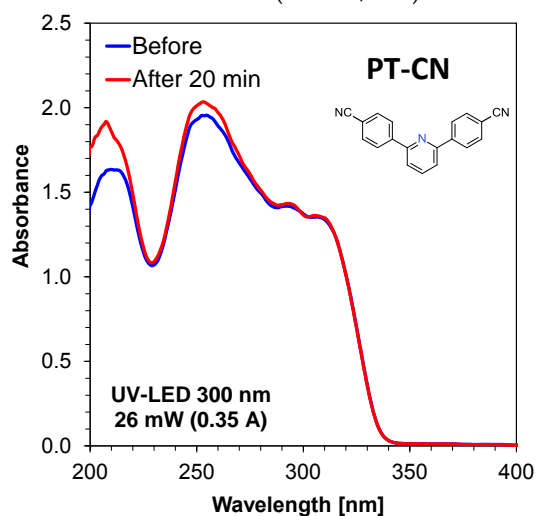

**Figure S23:** Photolysis of PT-CN (concentration:  $8.61 \cdot 10^{-5}$  [mol/dm<sup>3</sup>]) in ACN under 300nm (26mW/cm<sup>2</sup>).

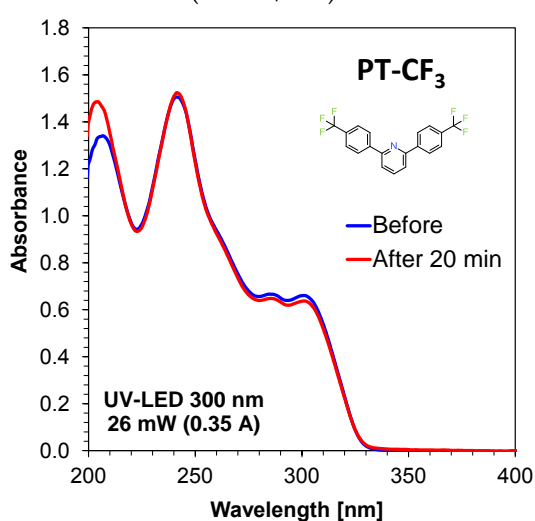

**Figure S24:** Photolysis of PT-CF<sub>3</sub> (concentration:  $5.56 \cdot 10^{-5}$  [mol/dm<sup>3</sup>]) in ACN under 300nm (26mW/cm<sup>2</sup>).

## Photolysis of 2,6-diphenylpyridine derivatives under 320nm (1mW/cm<sup>2</sup>).

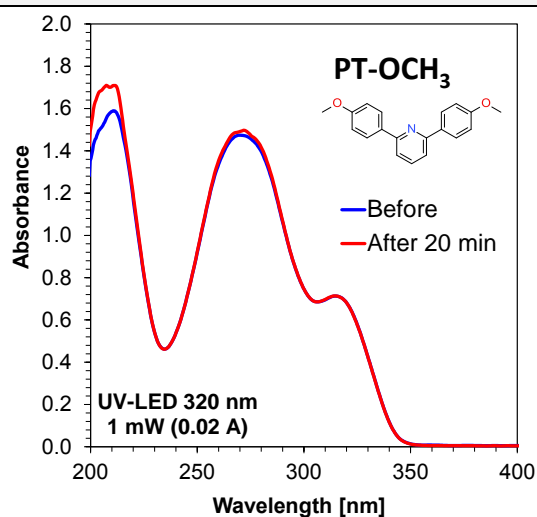

**Figure S25:** Photolysis of PT-OCH<sub>3</sub> (concentration:  $6.87 \cdot 10^{-5}$  [mol/dm<sup>3</sup>]) in ACN under 320nm (1mW/cm<sup>2</sup>).

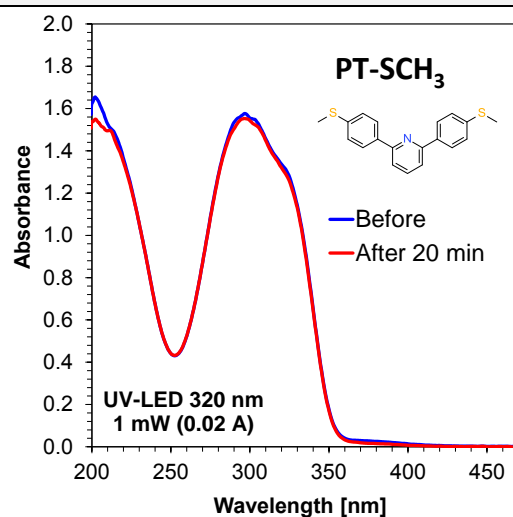

**Figure S26:** Photolysis of PT-SCH<sub>3</sub> (concentration:  $6.38 \cdot 10^{-5}$  [mol/dm<sup>3</sup>]) in ACN under 320nm (1mW/cm<sup>2</sup>).

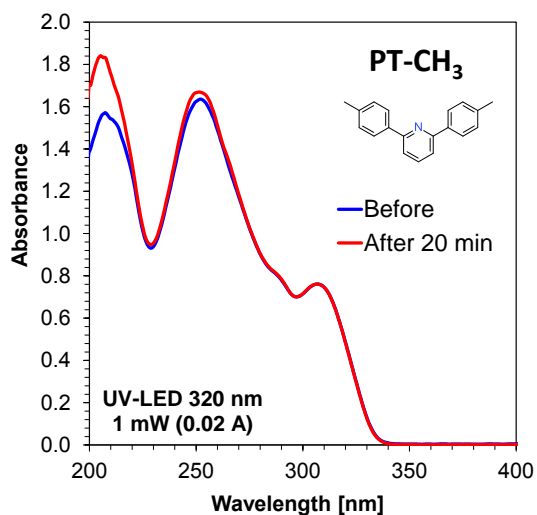

**Figure S27:** Photolysis of PT-CH<sub>3</sub> (concentration:  $8.03 \cdot 10^{-5}$  [mol/dm<sup>3</sup>]) in ACN under 320nm (1mW/cm<sup>2</sup>).

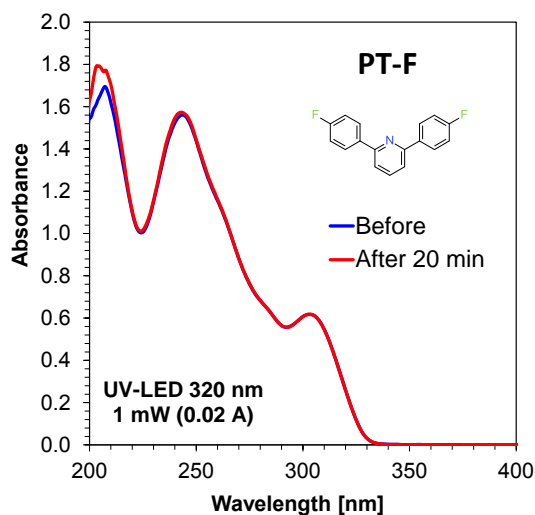

**Figure S28:** Photolysis of PT-F (concentration:  $7.34 \cdot 10^{-5}$  [mol/dm<sup>3</sup>]) in ACN under 320nm (1mW/cm<sup>2</sup>).

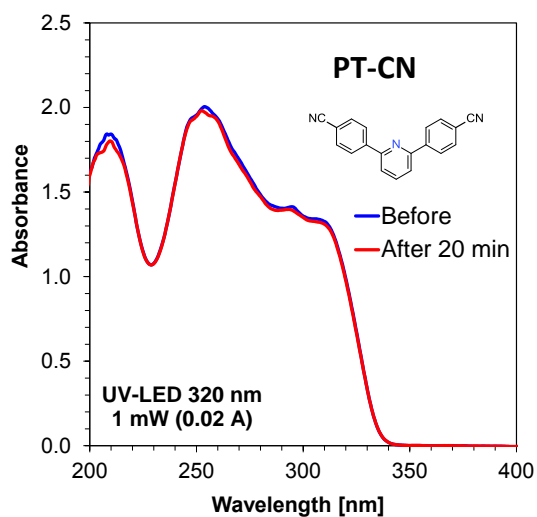

**Figure S29:** Photolysis of PT-CN (concentration:  $8.61 \cdot 10^{-5}$  [mol/dm<sup>3</sup>]) in ACN under 320nm ( $1\text{mW}/\text{cm}^2$ ).

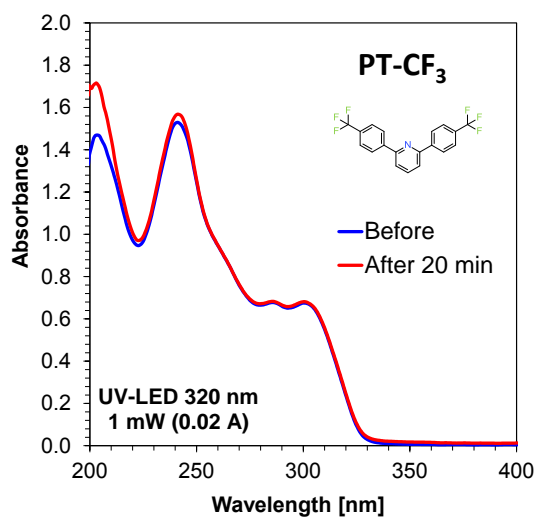

**Figure S30:** Photolysis of PT-CF<sub>3</sub> (concentration:  $5.56 \cdot 10^{-5}$  [mol/dm<sup>3</sup>]) in ACN under 320nm ( $1\text{mW}/\text{cm}^2$ ).

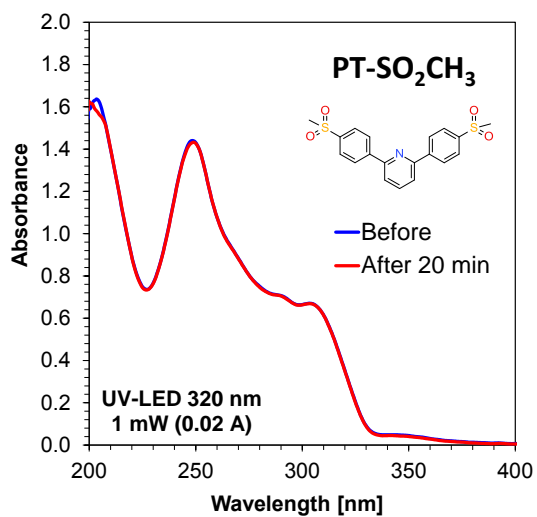

**Figure S31:** Photolysis of PT-SO<sub>2</sub>CH<sub>3</sub> (concentration:  $5.17 \cdot 10^{-5}$  [mol/dm<sup>3</sup>]) in ACN under 320nm ( $1\text{mW}/\text{cm}^2$ ).

Applicability of 2,6-diphenylpyridine derivatives for on-line monitoring progress of free-radical photopolymerization processes by FPT method

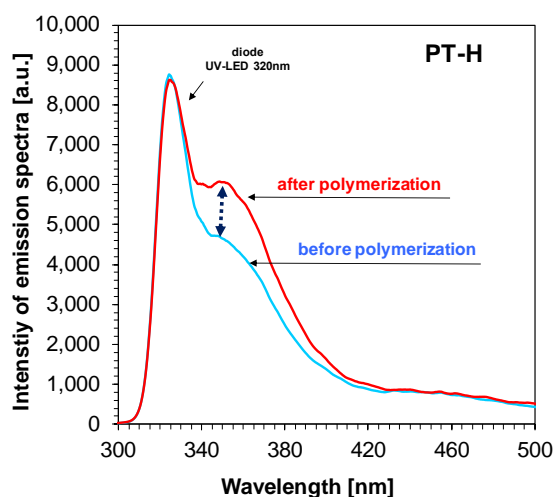

Figure S32: Changes of fluorescence spectra of the PT-H sensor during free-radical photopolymerization of TMPTA monomer under irradiation 320 nm.

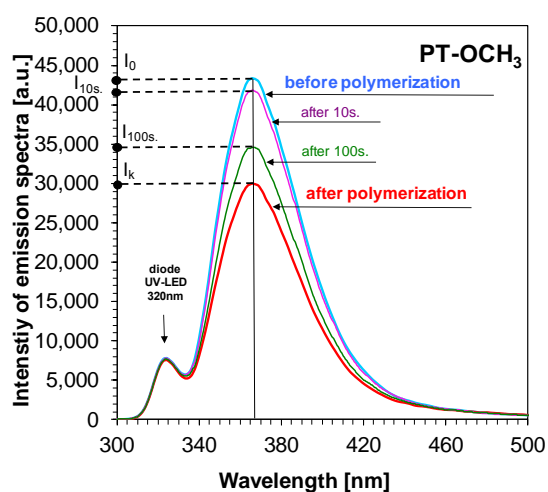

Figure S33: Changes of fluorescence spectra of the PT-OCH<sub>3</sub> sensor during free-radical photopolymerization of TMPTA monomer under irradiation 320 nm.

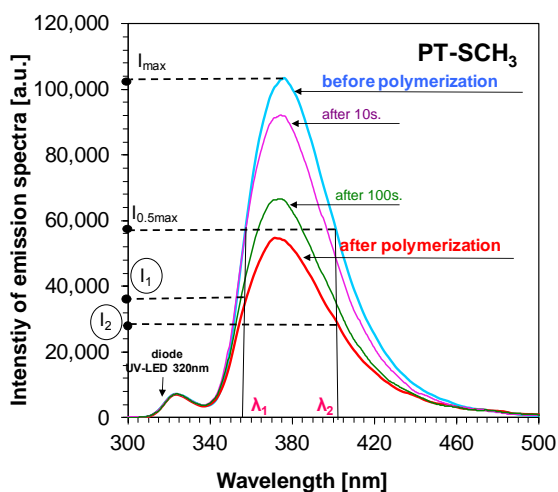

Figure S34: Changes of fluorescence spectra of the PT-SCH<sub>3</sub> sensor during free-radical photopolymerization of TMPTA monomer under irradiation 320 nm, ( $\lambda_1$ ,  $\lambda_2$  are monitoring wavelengths).

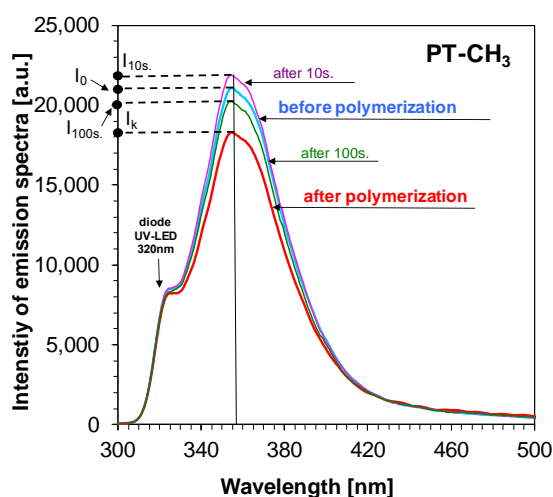

Figure S35: Changes of fluorescence spectra of the PT-CH<sub>3</sub> sensor during free-radical photopolymerization of TMPTA monomer under irradiation 320 nm.



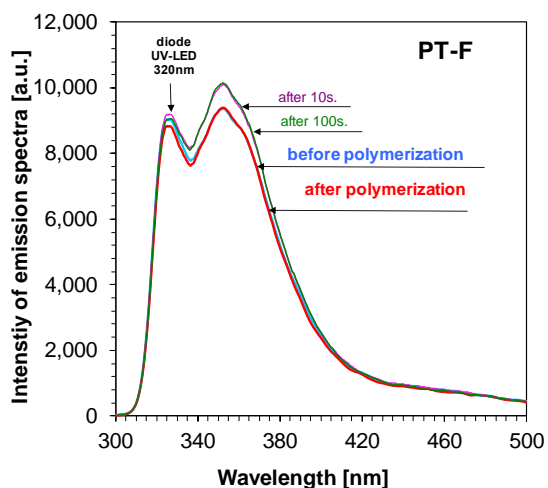

**Figure S36:** Changes of fluorescence spectra of the PT-F sensor during free-radical photopolymerization of TMPTA monomer under irradiation 320 nm.

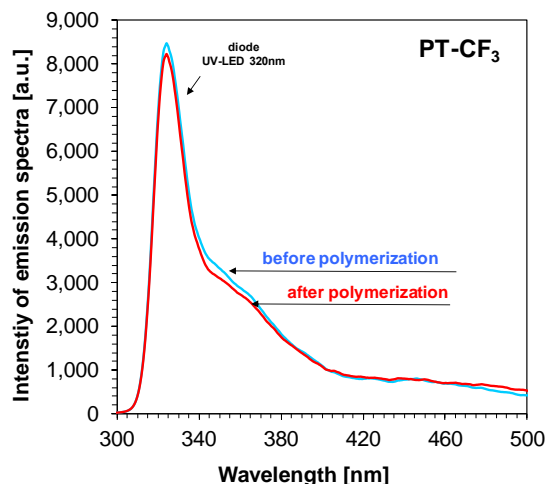

**Figure S37:** Changes of fluorescence spectra of the PT-CF<sub>3</sub> sensor during free-radical photopolymerization of TMPTA monomer under irradiation 320 nm.

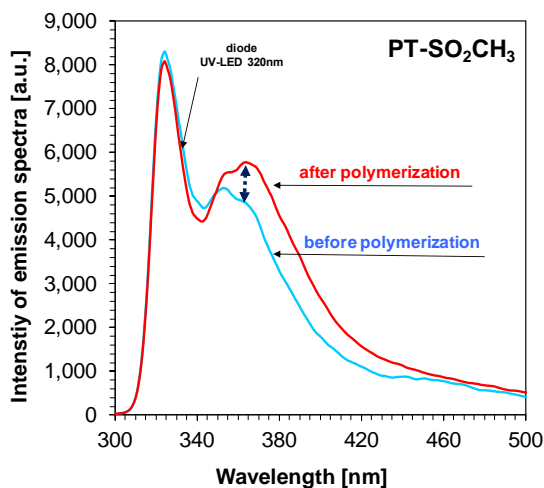

**Figure S38:** Changes of fluorescence spectra of the PT-SO<sub>2</sub>CH<sub>3</sub> sensor during free-radical photopolymerization of TMPTA monomer under irradiation 320 nm.

### Photolysis of PT-OCH<sub>3</sub> with different amount of HIP

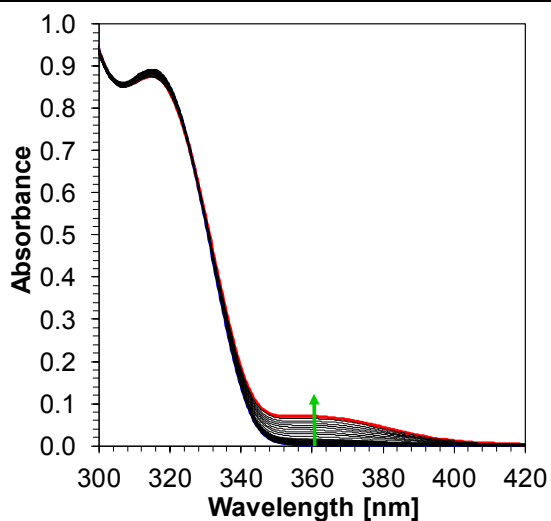

**Figure 39:** Photolysis of HIP/PT-OCH<sub>3</sub> in molar ratio 2:1 in ACN upon exposure to LED 320 nm (1mW/cm<sup>2</sup>).

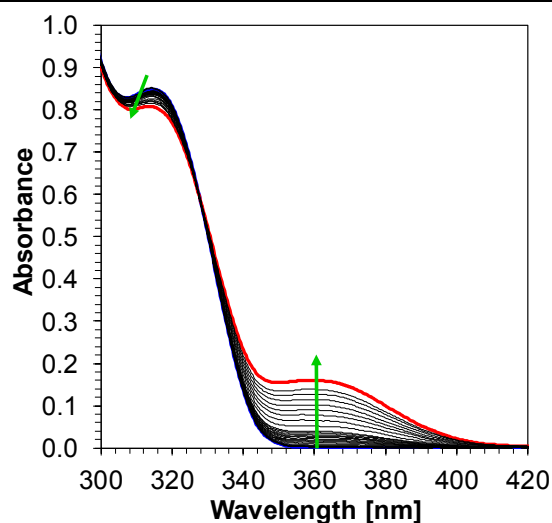

**Figure 40:** Photolysis of HIP/PT-OCH<sub>3</sub> in molar ratio 5.4:1 in ACN upon exposure to LED 320 nm (1mW/cm<sup>2</sup>).
